# Supplementary material for: Effect of Total Mixed Ration on Growth Performance, Rumen Fermentation, Nutrient Digestion, and Rumen Microbiome in Angus Beef Cattle during the Growing and Fattening Phases
Source: MDPI journal article supplement (doi:10.3390/fermentation10040205), 2024-04-10
Supplement: s1 [file s1]

# Supplementary Materials

**Table S1.** Alpha diversity index inter-group difference test results table.

| Estimators <sup>1</sup> | L              | H               | P_value |
|-------------------------|----------------|-----------------|---------|
| chao                    | 323.858±35.841 | 605.929±210.031 | < 0.01  |
| ace                     | 324.127±35.972 | 604.845±219.414 | < 0.01  |
| sobs                    | 320.067±34.238 | 556.571±150.756 | < 0.01  |
| pd                      | 43.297±3.841   | 58.467±8.166    | < 0.01  |
| shannon                 | 5.357±0.117    | 5.783±0.262     | < 0.01  |
| shannoneven             | 0.93±0.007     | 0.919±0.016     | 0.034   |
| simpson                 | 0.499±0.039    | 0.373±0.095     | < 0.01  |

<sup>1</sup> Expressing the findings with mean values and their standard errors (SEM).
